# Supplementary material
Source: MDPI journal article supplement (https://www.mdpi.com/2073-4395/12/5/1056)
Supplement: s1 [file s1]

**Table S1. List of wheat genotypes used in the study**

| No | Name            | Collection Center          |
|----|-----------------|----------------------------|
| 1  | Pakistan-13     | NARC, Islamabad, Pakistan  |
| 2  | Shahkar-13      | BARI, Chakwal Pakistan     |
| 3  | Aanmol-91       | NARC, Islamabad, Pakistan  |
| 4  | AARI-11         | AARI, Faisalabad Pakistan  |
| 5  | Punjab-11       | PMAS-AAUR, Pakistan        |
| 6  | AAS-11          | NARC, Islamabad, Pakistan  |
| 7  | Millet-11       | AARI, Faisalabad Pakistan  |
| 8  | Chakwal-50      | BARI, Chakwal Pakistan     |
| 9  | Pirsabak-08     | NARC, Islamabad, Pakistan  |
| 10 | Lasani-08       | AARI, Faisalabad Pakistan  |
| 11 | AUR-09          | AARI, Faisalabad Pakistan  |
| 12 | Pirsabak-05     | NARC, Islamabad, Pakistan  |
| 13 | Bhakkar-02      | AZRI, Bhakkar, Pakistan    |
| 14 | Chakwal-97      | BARI, Chakwal Pakistan     |
| 15 | Sariab-92       | AARI, Faisalabad Pakistan  |
| 16 | Inqalab-91      | NARC, Islamabad, Pakistan  |
| 17 | Pirsabak-91     | NARC, Islamabad, Pakistan  |
| 18 | AUR-10          | NARC, Islamabad, Pakistan  |
| 19 | Bahawalpur-2000 | AZRI, Bahawalpur, Pakistan |
| 20 | Bwp-97          | AZRI, Bahawalpur, Pakistan |
| 21 | Chakwal-86      | BARI, Chakwal Pakistan     |
| 22 | Barani-83       | PMAS-AAUR, Pakistan        |
| 23 | Sarhad-82       | NARC, Islamabad, Pakistan  |
| 24 | Pak-81          | NARC, Islamabad, Pakistan  |
| 25 | SA-75           | PMAS-AAUR, Pakistan        |
| 26 | Lyp-73          | PMAS-AAUR, Pakistan        |
| 27 | Bahawalpur-79   | AZRI, Bhakkar, Pakistan    |
| 28 | Fsd-83          | AARI, Faisalabad Pakistan  |
| 29 | Punjab-85       | AARI, Faisalabad Pakistan  |
| 30 | Khyber-87       | NARC, Islamabad, Pakistan  |

**NARC, national agricultural research center; AARI, ayub agricultural research institute; AZRI, arid zone research instate; PMAS-AAUR, pir mehr ali shah arid agriculture university Rawalpindi.**

**Table S2.** List of primers used in relative gene expression analysis.

| <b>Genes</b> | <b>Primers (5'-3')</b>                                 |
|--------------|--------------------------------------------------------|
| TaDREB1A     | CGGAACCACTCCCTCCATCTC (F)<br>CGGTTGCCCCATTAGACGTCA (R) |
| TaARGOS-A    | GATCATCTTCCACCACCATCTC (F)<br>GCACCTACATGGGTGTTCTT (R) |
| TaLEA3       | AGTACACCAAGGAGTCCGC (F)<br>CATTGTCACCACCCATGCC (R)     |
| TaHSFA1a     | AGCATTCCAGGATTCCCAGAT (F)<br>CCAGGCATTGCGAAATTCTC (R)  |
| TaWRKY44     | GCCCCCCTTCGCTCTTCTC (F)<br>CAGCACACCAGAAATGGGCTAAT (R) |
| TaEXPA2      | TCAGG TTCACCATCAACGGG(F)<br>TCTCACACACCACTCCATGC (R)   |
